# Supplementary material for: Integrative Analysis of Metabolome and Transcriptome Revealed Lutein Metabolism Contributed to Yellow Flower Formation in Prunus mume
Source: MDPI journal article supplement (doi:10.3390/plants12183333), 2023-09-21
Supplement: s1 [file s1]

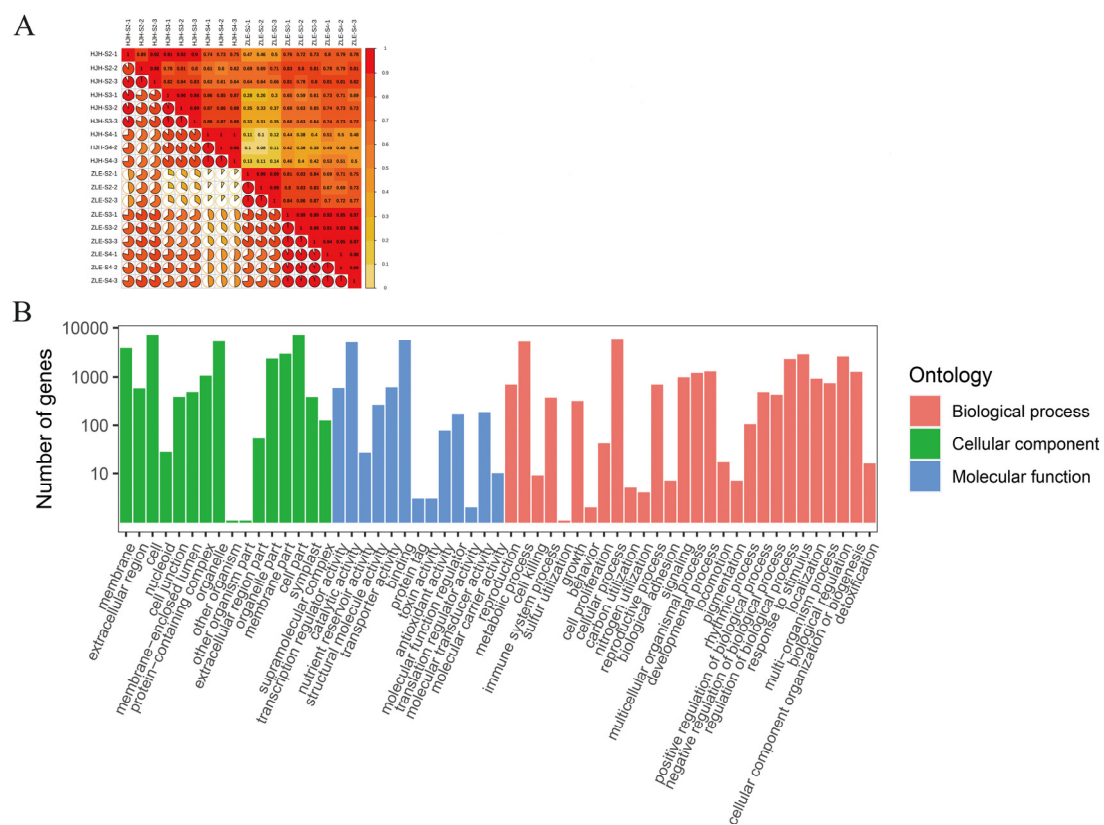

Supplementary Figure S1

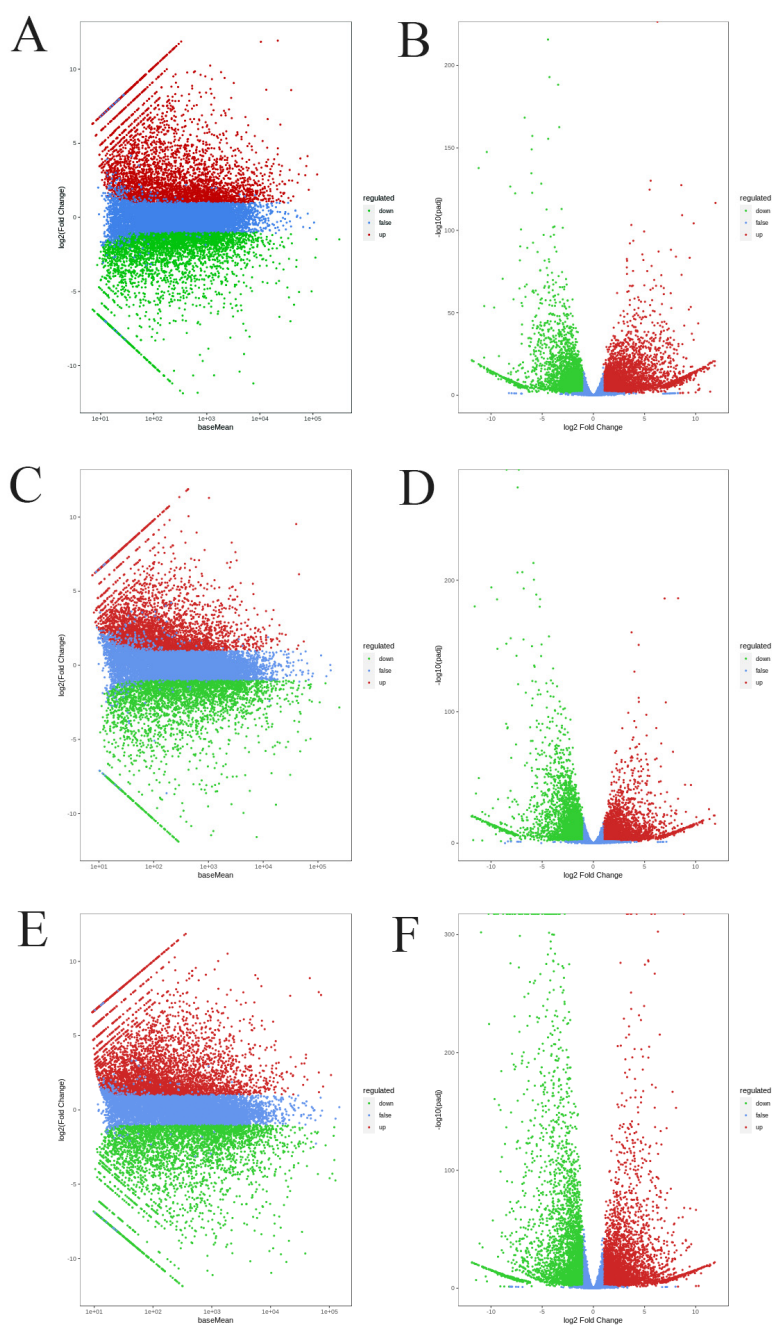

Supplementary Figure S2

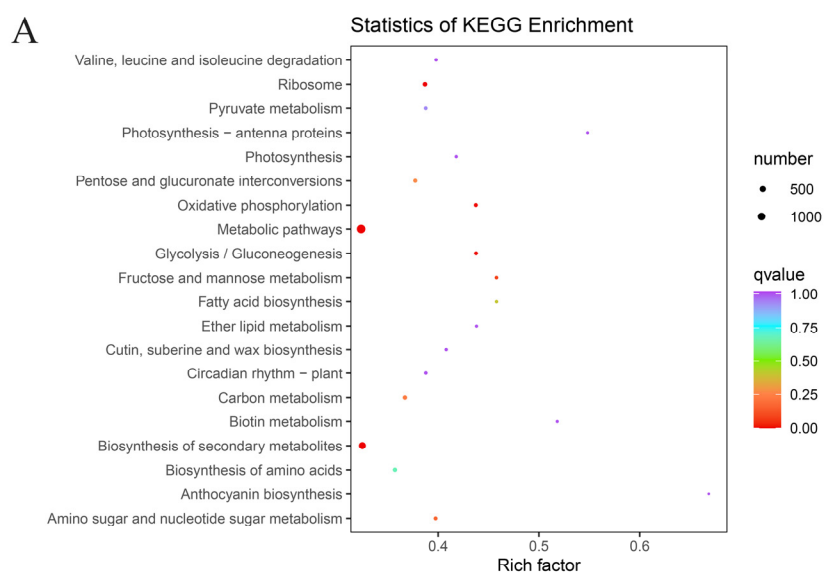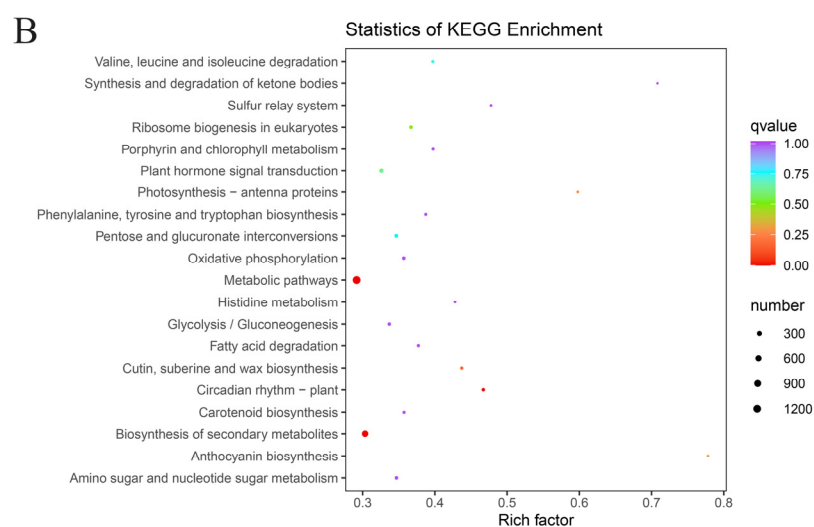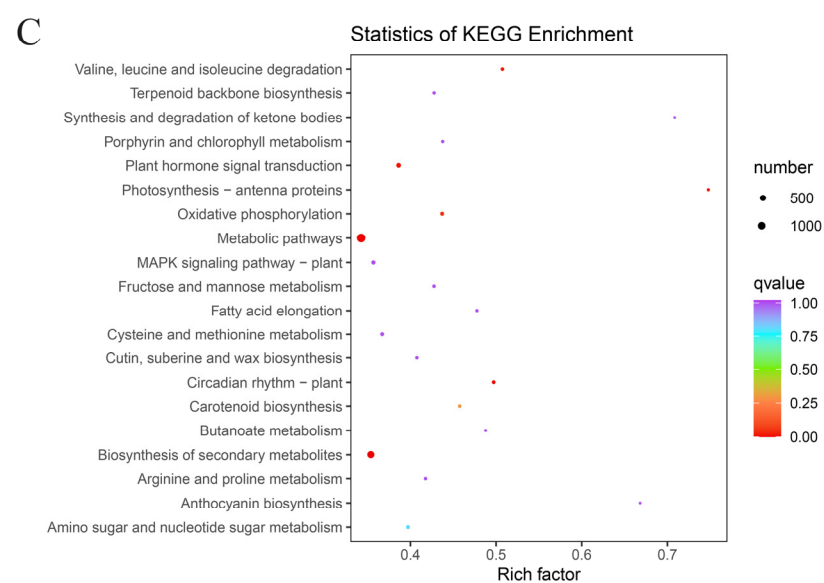

Supplementary Figure S3

PmCCD4 -----MDAFS--SSFLSTFTPTQNFSLSPAI-----ATPKLSSISSVRIEERPPSSPPASPSTKAPQP---PKTSPPLTTKARDY--N 72  
 AtCCD4 -----MDSVSSSSFLSSTFSLHSLRRR-----SSSPTLLRINSVVEERSPTINPSDNNDRRKPKT-----LHNRNHTLVS 70  
 NtCCD4 -----MDAFS--STFLSTLSQHPKSLSPN----YSPNTSSSPILKVSSVRIEERPQTTTTTTRTKPQEKPTP---SPYTPPKDTPKQRL--- 76  
 MdCCD4 -----MDAFS--STFLSTLSQHPKSLSPN----YSPNTSSSPILKVSSVRIEERPQTTTTTTRTKPQEKPTP---SPYTPPKDTPKQRL--- 76  
 OfCCD4 -----MDTSL--SSFLPKL--HPKYIFSPIPLSPPTSPHPQNSLNISSVRIEDKPQTTTTTTTSRRAPQPVKKQTPPPSPQQNTNRK--- 83  
 OsCCD4 MQRICPAHCSVTHSLTMKSMRLSYIPPAASAAPQSPSYGKKKNASAAAPSSAAASTVLTSLPLVTTTTRTPKQTEQEDELQVAKTKTTRTVIATNNGRA--- 97

PmCCD4 NASTFSAAKKQ-----TDP-TLPAVIFNALDDIINNFTDPP-LRPSVDPKHVLNNFAPV-DELPPTECBTIHGSPPCL-DGAYIRNGPNPQYLPRGPF 163  
 AtCCD4 SPPKL----RP-----EM--TLATALFTTVEDVINFTDPP-SRPSVDPKHVLSDNFAPVDELPPTECBTIHGTPLSL-NGAYIRNGPNPQYLPRGPF 157  
 NtCCD4 -PTKSITTKKP-----VEP-SFPSVIFNAFDVFNFTDPP-LKPGVDPKYILSNFAPV-DELPPTECBTVVGSPPCL-DGAYIRNGPNPQYLPRGPF 166  
 MdCCD4 NASTFTAAKQT-----VS--ALPAVIFNALDDIINNFTDPP-VKPSVDPRHVLNNFAPV-DELPPTECBTIHGSPPCL-DGAYIRNGPNPQYLPRGPF 129  
 OfCCD4 -PSTPKT--RP-----TEPVSLPTTIFNVVDGFINTFDPP-LRPSVDPRYVLSDNFAPV-DELPPTECBTVVGSPPCL-NGAYIRNGPNPQYLPRGPF 172  
 OsCCD4 APSQSRPRRRPAPAAAAAASLMTFCNALDEVINFTDPPALRPVADPRHVLNNFAPV-DELPPTECBTVVGSPPCL-NGAYIRNGPNPQYLPRGPF 196

PmCCD4 HIFDGDGMLHSVRI-----SKGRAVLCSRYVRYTYKYTIERDAGYPLPNVFSGNGLTASATRGALSAARVFT--QNPANGIGLANTSLAFFGNQLYALG 257  
 AtCCD4 HIFDGDGMLHAIKI-----HNGKATLCSRYVRYTYKYTIERDAGYPLPNVFSGNGLTASVARGALTAARVLTGQNPANGIGLANTSLAFFSNRLEALG 252  
 NtCCD4 HIFDGDGMLHSIKI-----SQSKATLCSRYVRYTYKYTIEREAGSPVFPNPVFSGNGLTASAARGAITAARAIAAGQNPANGIGLANTSLALFGGKLEALG 261  
 MdCCD4 HIFDGDGMLHSVRI-----SGGRAVLCSRYVRYTYKYTIERDARHPLPNVFSGNGLTASATRGALSAARVLTGQNPANGIGLANTSLAFFGDRLYALG 224  
 OfCCD4 HIFDGDGMLHSVRI-----SUGKATLCSRYVRYTYKYTIEREAGSPVFPNPVFSGNGLTASAARGALAAARVAGQNPANGIGLANTSLALIGGKLYALG 267  
 OsCCD4 HIFDGDGMLHSVRI-----LSPASSGDDPVLCSRYVRYTYKYTIERDAGYPLPNVFSGNGLTASATRGALSAARVLTGQNPANGIGLANTSLAYFAGRLYALG 295

PmCCD4 ESDLPLYSLRITSN-GDIITLGRHDFDGKLFMSMTAHPKIDPDTCEAFAFRYGFLPPFLTYFRFANGHKQPDVPIFSMVTFSFLHDFAITKKYAIFFVFIQ 356  
 AtCCD4 ESDLPLYAVRITES-GDIETLGRYDFDGKLFMSMTAHPKIDPDTCEAFAFRYGVPVPPFLTYFRFSAGKKQPDVPIFSMTSPSFLHDFAITKKHAIFFAIQ 351  
 NtCCD4 ESDLPLYAVKAPD-GDIITLGRYDFDGKLFMSMTAHPKIDPDTCEAFAFRYGPMPPFLTYFRFEPNGTKTPDVPIFSMTSPSFLHDFAITKKHAIFFAIQ 360  
 MdCCD4 ESDLPLYSLRITSN-GDIITLGRHDFDGKLFMSMTAHPKIDPDTCEAFAFRYGFLPPFLTYFRFSNGVKKQPDVPIFSMVTFSFLHDFAITKKHAIFFAIQ 323  
 OfCCD4 ESDLPLYAVENQON-GDIYTEGRNDFDGKLFMSMTAHPKIDPDTCEAFAFRYGPMRPPFLTYFRFNADGKQPDVPIFSMTSPSFLHDFAITKKYAIFFFIQ 366  
 OsCCD4 ESDLPLYAVRHPDTEVTHGRDFDGKLFMSMTAHPKIDPDTCEAFAFRYGVPVPPFLTYFRFPAGNKGADVPIFSVQPSFLHDFAITKKYAIFFFIQ 395

PmCCD4 IG--MNPIDMITKGASVGLLPSKVSRLGVIPRYAKDETEMWFDVPGENIHAHNAWDEED--ATVMVAPNVLSEHTLERMMLTHASVEKVRIDLKTG 452  
 AtCCD4 LGMRMMLDLVLEGGSPVGTNGCTPRLGVIPRYAKDESEMWFVDPGENIHAHNAWDEDDGNSVVLTAIPNIMSHTLERMMLVHALVEKVKIDLVITG 451  
 NtCCD4 IG--MNPLEFIT-GGSPVSSDSCHIPRLGVIPRYAKDESEMWFVDPGENIHAHNAWDEDDGDTIVMVAPNVLSEHTLERMMDIHASVEKVKIDLVITG 457  
 MdCCD4 IG--LNLIDMITKRATPFGLLPSKVSRLGVIPRYAKDESEMWFVDPGENIHAHNAWDEDD--ATVMVAPNVLSEHVLRLVHLVHCTIVEKVRIDLKTG 419  
 OfCCD4 IG--MNPMEEMA-GGSPVGANPGKVPRLGVIPRYAKDESEMWFVDPGENIHAHNAWDEDDGDTIVLVAPNVLSEHTLERMMLTHASVEKVKIDLVITG 463  
 OsCCD4 IV--MKPMDVMVVGSGSPVGSPPGVRLGVIPRYATDESEMRFVDPGENIHAHNAWDEAGGEEELVLAAPNVLSEHALCHMLVHSCVEKVRINLRTG 493

PmCCD4 IVSRQPISTRNIDFAMNPAYVGRKNKYVYAAVGDMPKISGVVKLDVS--NVEHKECTVASRMFGPGCYGGEPEFFVAREPENPEADEDGCVVYVYVHDE 550  
 AtCCD4 IVRRHPIISARNIDFAMNPAYVGRKNKYVYAAVGDMPKISGVVKLDVS--KGDRDCTVARRMFGSGCYGGEPEFFVARDPGNPEABEDDGYVYVYVHDE 549  
 NtCCD4 IVSRQPISTRNIDFAMNPAYVGRKNKYVYAAVGDMPKISGVVKLDVSVAEADRRDCTVARRMFGSGCYGGEPEFFVAREPENPEADEDGCVVYVYVHDE 554  
 MdCCD4 IVTRQPISTRNIDFAMNPAYVGRKNKYVYAAVGDMPKISGVVKLDVS--NVEHKECTVASRMFGPGCYGGEPEFFVAREPENPEADEDGCVVYVYVHDE 517  
 OfCCD4 IVSRHPISSRNIDFAMNPAYVGRKNKYVYAAVGDMPKISGVVKLDVSVSDSDRCDCTVARRMFGSGCYGGEPEFFVAREPENPEADEDGCVVYVYVHDE 563  
 OsCCD4 VVTRTPLAAGNDFDPMNPAYVGRKNKYVYAAVGDMPKISGVVKLDVSVSDSDRCDCTVARRMFGSGCYGGEPEFFVAREPENPEADEDGCVVYVYVHDE 590

PmCCD4 KAGESRFLVMDAKSPRFDIVAVRLPRRPVYGFHGLFVKESDNLK-- 596  
 AtCCD4 VTGESKFLVMDAKSPFLSIVAAVRLPRRPVYGFHGLFVKESDNLK-- 595  
 NtCCD4 KTGESRFLVMDAKSPNLDIVAAVRLPRRPVYGFHGLFVRESDLKLM- 601  
 MdCCD4 KAGESRFLVMDAKSPOLDIVAAVRLPRRPVYGFHGLFVRESDL---- 560  
 OfCCD4 KTGESRFLVMDAKSPNLDIVAAVRLPRRPVYGFHGLFVRESDLKLM-- 609  
 OsCCD4 ATGENRFLVMDAKSPDLIVAEVQLGRVPYGFHGLFVTEAEIQSQHQ 638

Supplementary Figure S4
